# Supplementary material
Source: publisher figshare collection journal article supplement (https://gsajournals.figshare.com/ndownloader/files/13837949)
Supplement: Supplementary file 1 [file 13837949]

## Sheet: Hoja1
Supplementary File S7. List of primers and parameters used in this study.
Gene Name	Purpose	gene locus ID	Primer	Primer Sequence (5' - 3')	Product size (bp)	TM (ºC)	Efficiency (%)	Reference
SPL2 like	qRT-PCR	VIT_01s0010g03710	forward	TTCTGATCACAATGCACGCC	99	57	98.8	this work
			reverse	CTCATTTGCTGCTTCCCACC
CC-NBS-LRR	qRT-PCR	VIT_13s0067g00750	forward	AGAGAGGCTGCTTATGACACC	111	60	93.7	this work
CC-NBS-LRR		VIT_13s0067g00740/50	reverse	GAAGCAAGCATACCTCTTGAGA
Plus3 domain	qRT-PCR	VIT_05s0020g04860	forward	CCAGCCAAAGATGAATGCAGA	93	58	97.2	this work
Zinc knuckle (CCHC-type)		VIT_05s0020g04860	reverse	GCTTTCCCAATGCACTGACT
NB-ARC-LRR	qRT-PCR	VIT_12s0034g01460	forward	ACCACTTCACGGGGTTTTACT	150	57	98.2	this work
NB-ARC-LRR2		VIT_18s0041g01750	reverse	CGGAGTTCTTAGCCTGTCCC
TAS4a	qRT-PCR	-	forward	CTTCATTTTTTCTGGTTCTA	235	55	76.5	this work
			reverse	TGATCTCATAAGATGGTTGTTC
TAS4b	qRT-PCR	-	forward	GAGTATGCCAGTGAAGCCAAAA	105	58	91.7	this work
			reverse	TGTTTGTAACCTGGACACG
TAS4c	qRT-PCR	-	forward	TGACTATCCAGGTTGATG	170	55	97.5	this work
			reverse	ACAGGTCAGCCCCCACAA
pre-MIR828.3	qRT-PCR	-	forward	TTCATTGGTGAGCTGAGAAAG	111	60	not determined	this work
myosin heavy chain-related		VIT_07s0005g01690	reverse	TCACAAGCTGTTGTTTGGAAT
pre-MIR403f	qRT-PCR	VIT_07s0005g01690	forward	GCGACACCACACACAATCAGA	91	60	97.9	this work
myosin heavy chain-related		VIT_07s0005g01690	reverse	AAGGACTGGAGAGGAAGGAAG
MYBA6.1	qRT-PCR	VIT_14s0006g01290	forward	TCCGATCGGGGTTGAACC	172	60	99.7	Matus et al., 2017
			reverse	CTTCCCGGAAGCCTACCAG
MYBA7	qRT-PCR	VIT_14s0006g01280	forward	CTGAACTCATGGTGGGAA	160	57	81.5	Matus et al., 2017
			reverse	ATTTGGCCATTTGTAATA
UBIQUITIN-1	qRT-PCR	VIT_16s0098g01190	forward	TCTGAGGCTTCGTGGTGGTA	99	55	99	Dauelsberg et al., 2011
			reverse	AGGCGTGCATAACATTTGCG
Anti-miR828-LNA	sRNA blot	-	SS_miR828-LNA (+ indicates locked nucleic acid chemistry)	T+GG+AATACTCATTTGAGC+AA				this work
Anti-5S rRNA	sRNA blot	-	At_Anti5S rRNA	AGGACTTCCCAGGAGGTCACCCC				this work
